# Supplementary material for: Multiomics Analysis Reveals Cuproptosis-Related Signature for Evaluating Prognosis and Immunotherapy Efficacy in Colorectal Cancer
Source: Cancers (Basel). 2023 Jan 6;15(2):387. doi: 10.3390/cancers15020387 (PMC9856392; doi:10.3390/cancers15020387)
Supplement: Supplementary file 1 [file cancers-15-00387-s001.zip › Supplementary Tables.xls]

## Sheet: S1
Table S1.The clinical characteristics of the TCGA cohort,GSE17536 and GSE39582 cohort.
Variables	TCGA cohort(n=458)	GSE17536(n=177)	GSE39582(n=566)
Age
<=65	186	83	222
>65	272	94	343
unknow			1
Gender
Female	217	81	256
Male	241	96	310
Grade
G1	-	16	-
G2	-	134	-
G3	-	27	-
unknow	-		-
Stage
Ⅰ	78	24	33
Ⅱ	180	57	264
Ⅲ	125	57	205
Ⅳ	64	39	60
unknow	11
T classification
T1	11	-	11
T2	78	-	45
T3	311	-	367
T4	57	-	119
unknow			20
M classification
M0	338	-	482
M1	64	-	61
Mx	49	-	3
unknow	7	-	20
N classification
N0	273	-	302
N1	104	-	134
N2	81	-	98
N3	-	-	6
unknow			26
Survival status（OS）
Survival	97	-	380
Death	361	-	177
unknow			9

## Sheet: S2
Table S2.19 cuproptosis-related genes
Gene	Description
NFE2L2	NFE2 Like BZIP Transcription Factor 2
NLRP3	NLR Family Pyrin Domain Containing 3
ATP7B	ATPase Copper Transporting Beta
ATP7A	ATPase Copper Transporting Alpha
SLC31A1	Solute Carrier Family 31 Member 1
FDX1	Ferredoxin 1
LIAS	Lipoic Acid Synthetase
LIPT1	Lipoyltransferase 1
LIPT2	Lipoyl(Octanoyl) Transferase 2
DLD	Dihydrolipoamide Dehydrogenase
DLAT	Dihydrolipoamide S-Acetyltransferase
PDHA1	Pyruvate Dehydrogenase E1 Subunit Alpha 1
PDHB	Pyruvate Dehydrogenase E1 Subunit Beta
MTF1	Metal Regulatory Transcription Factor 1
GLS	Glutaminase
CDKN2A	Cyclin Dependent Kinase Inhibitor 2A
DBT	Dihydrolipoamide Branched Chain Transacylase E2
GCSH	Glycine Cleavage System Protein H
DLST	Dihydrolipoamide S-Succinyltransferase

## Sheet: S3
Table S3.qPCR primers.
Gene	Primers Sequence (5'->3')
HES4	Forward:GGTGTGTGAACCCGGCTCCG
	Reverse:CCGAGGCGTGACTGACAGCG
SPHK1	Forward:TGGCCTACCTCCCTGTAGGA
	Reverse:CATGGGTGCAGCAAACATCT
TNNT1	Forward:TGATCCCGCCAAAGATCCC
	Reverse:TCTTCCGCTGCTCGAAATGTA
HOXC6	Forward:ACAGACCTCAATCGCTCAGGA
	Reverse:AGGGGTAAATCTGGATACTGGC
SFRP2	Forward:CGACATGCTTGAGTGCGAC
	Reverse:CTTTGGAGCTTCCTCGGTGG
GAPDH	Forward:AGAAGGCTGGGGCTCATTTG
	Reverse:GCAGGAGGCATTGCTGATGAT

## Sheet: S4
Table S4.GSVA enrichment analysis of cuproptosis-related molecular subtypes
id	logFC	AveExpr	t	P.Value	adj.P.Val	B
KEGG_UBIQUITIN_MEDIATED_PROTEOLYSIS	-0.172542	0.00447833	-16.5145	2.1908e-55	4.03108e-53	115.119
KEGG_RNA_DEGRADATION	-0.210847	0.00414363	-14.2252	1.45155e-42	1.33543e-40	85.8521
KEGG_LYSINE_DEGRADATION	-0.176269	0.000667611	-14.118	5.36918e-42	3.2931e-40	84.5561
KEGG_BASAL_TRANSCRIPTION_FACTORS	-0.193121	0.00574944	-14.0128	1.92678e-41	7.79655e-40	83.2902
KEGG_AMINOACYL_TRNA_BIOSYNTHESIS	-0.26222	0.0132238	-14.005	2.11863e-41	7.79655e-40	83.1962
KEGG_NEUROACTIVE_LIGAND_RECEPTOR_INTERACTION	0.146636	-0.000172516	13.9065	6.95924e-41	2.13417e-39	82.018
KEGG_PROPANOATE_METABOLISM	-0.207516	0.0057408	-13.8726	1.04568e-40	2.74863e-39	81.6147
KEGG_COMPLEMENT_AND_COAGULATION_CASCADES	0.189383	-0.000990993	13.6208	2.11777e-39	4.87086e-38	78.6349
KEGG_SELENOAMINO_ACID_METABOLISM	-0.171255	0.00283887	-13.3953	3.02657e-38	6.18765e-37	76.0009
KEGG_GLYCOSAMINOGLYCAN_BIOSYNTHESIS_CHONDROITIN_SULFATE	0.22762	-0.0125531	12.7954	3.05236e-35	5.61634e-34	69.1533
KEGG_CITRATE_CYCLE_TCA_CYCLE	-0.214564	0.00439659	-12.1486	4.04361e-32	6.76386e-31	62.0395
KEGG_GLYCOSAMINOGLYCAN_DEGRADATION	0.176903	-0.00437362	11.7636	2.54866e-30	3.90795e-29	57.9412
KEGG_PEROXISOME	-0.149977	0.00304001	-11.4345	8.10043e-29	1.14652e-27	54.5215
KEGG_VALINE_LEUCINE_AND_ISOLEUCINE_DEGRADATION	-0.185298	0.000619026	-11.3843	1.36297e-28	1.79134e-27	54.0072
KEGG_GLYCOSAMINOGLYCAN_BIOSYNTHESIS_KERATAN_SULFATE	0.183665	-0.00354965	11.3713	1.55985e-28	1.91342e-27	53.8738
KEGG_SPLICEOSOME	-0.171832	0.00158981	-11.0336	4.92826e-27	5.6675e-26	50.4616
KEGG_DILATED_CARDIOMYOPATHY	0.136495	-0.00392013	10.9899	7.66143e-27	8.29237e-26	50.0257
KEGG_CELL_CYCLE	-0.15545	0.00549634	-10.5482	6.08736e-25	5.89513e-24	45.7048
KEGG_NON_HOMOLOGOUS_END_JOINING	-0.187283	0.000462225	-10.455	1.50386e-24	1.38356e-23	44.8119
KEGG_NUCLEOTIDE_EXCISION_REPAIR	-0.160755	0.00170838	-10.2312	1.28559e-23	1.12642e-22	42.6942
KEGG_GLYCOSYLPHOSPHATIDYLINOSITOL_GPI_ANCHOR_BIOSYNTHESIS	-0.153954	0.00272791	-10.1341	3.22334e-23	2.69588e-22	41.7872
KEGG_GLYCOSPHINGOLIPID_BIOSYNTHESIS_GLOBO_SERIES	0.14763	0.00349895	9.79504	7.53725e-22	6.0298e-21	38.6784
KEGG_CELL_ADHESION_MOLECULES_CAMS	0.150164	-0.000417041	9.76879	9.58482e-22	7.05443e-21	38.4414
KEGG_HYPERTROPHIC_CARDIOMYOPATHY_HCM	0.116627	-0.00247613	9.71571	1.55567e-21	1.10094e-20	37.9639
KEGG_ARACHIDONIC_ACID_METABOLISM	0.117824	-0.000324884	9.70506	1.71398e-21	1.16805e-20	37.8684
KEGG_HEMATOPOIETIC_CELL_LINEAGE	0.157896	-0.005284	9.64841	2.86555e-21	1.88308e-20	37.3618
KEGG_CYTOKINE_CYTOKINE_RECEPTOR_INTERACTION	0.122935	-0.00265887	9.45871	1.57296e-20	9.98014e-20	35.6837
KEGG_CYSTEINE_AND_METHIONINE_METABOLISM	-0.110848	0.0047944	-9.29496	6.68526e-20	4.10029e-19	34.2583
KEGG_MISMATCH_REPAIR	-0.176755	0.0024154	-9.11402	3.22616e-19	1.91488e-18	32.7083
KEGG_SYSTEMIC_LUPUS_ERYTHEMATOSUS	0.168597	-0.00379085	8.92177	1.66899e-18	9.59671e-18	31.0906
KEGG_GLYCOSPHINGOLIPID_BIOSYNTHESIS_GANGLIO_SERIES	0.136224	0.00140119	8.70717	1.00896e-17	5.46025e-17	29.3205
KEGG_INTESTINAL_IMMUNE_NETWORK_FOR_IGA_PRODUCTION	0.175076	-0.0042779	8.66031	1.48708e-17	7.81779e-17	28.9391
KEGG_FATTY_ACID_METABOLISM	-0.136995	0.0040091	-8.6004	2.43534e-17	1.24473e-16	28.454
KEGG_ASTHMA	0.176312	-0.000283697	8.44862	8.38717e-17	4.17092e-16	27.2385
KEGG_AUTOIMMUNE_THYROID_DISEASE	0.157903	0.000806334	8.25692	3.8916e-16	1.88435e-15	25.7307
KEGG_PYRUVATE_METABOLISM	-0.113889	0.00195783	-8.17468	7.44723e-16	3.42573e-15	25.0934
KEGG_VIRAL_MYOCARDITIS	0.128056	-0.00163726	8.1431	9.54045e-16	4.28157e-15	24.8502
KEGG_PRION_DISEASES	0.102748	0.00156975	8.04247	2.08926e-15	8.73689e-15	24.0807
KEGG_ECM_RECEPTOR_INTERACTION	0.139312	-0.00928749	7.83361	1.03458e-14	4.13833e-14	22.5112
KEGG_TYPE_I_DIABETES_MELLITUS	0.151928	-0.00473628	7.5949	6.15528e-14	2.35952e-13	20.7632
KEGG_BUTANOATE_METABOLISM	-0.123363	0.00660634	-7.45718	1.68456e-13	6.32568e-13	19.777
KEGG_GRAFT_VERSUS_HOST_DISEASE	0.176533	-0.00724284	7.43895	1.92244e-13	7.07458e-13	19.6477
KEGG_PROTEIN_EXPORT	-0.137813	-0.00476997	-7.31207	4.78199e-13	1.62942e-12	18.7557
KEGG_ALLOGRAFT_REJECTION	0.169754	-0.0080271	7.18607	1.16594e-12	3.90059e-12	17.8838
KEGG_ANTIGEN_PROCESSING_AND_PRESENTATION	0.115238	-0.0072021	6.72491	2.70705e-11	8.16552e-11	14.8119
KEGG_PRIMARY_IMMUNODEFICIENCY	0.123239	-0.00421718	6.61952	5.41189e-11	1.58062e-10	14.1363
KEGG_SULFUR_METABOLISM	0.108894	0.00189861	6.53715	9.23688e-11	2.61475e-10	13.6152
KEGG_DNA_REPLICATION	-0.136693	0.00510681	-6.25086	5.65429e-10	1.55282e-09	11.8514
KEGG_LEISHMANIA_INFECTION	0.109521	-0.000826184	6.12029	1.2613e-09	3.26872e-09	11.0715
KEGG_ONE_CARBON_POOL_BY_FOLATE	-0.107956	0.00555061	-6.02219	2.28177e-09	5.8312e-09	10.4958
KEGG_HOMOLOGOUS_RECOMBINATION	-0.109873	0.000603829	-5.96166	3.27536e-09	8.14415e-09	10.1449

## Sheet: S5
Table S5.Differentially expressed genes between cuproptosis-related molecular subtypes
gene	logFC	AveExpr	t	P.Value	adj.P.Val	B
CDKN2A	0.870405	4.41007	19.7575	1.94809e-75	1.72026e-71	160.961
BRCC3	-0.613634	7.03959	-19.4275	2.64235e-73	1.55555e-69	156.085
CERS6	-0.672405	6.89365	-18.7941	2.89837e-69	1.02376e-65	146.848
HOOK1	-0.713371	6.24018	-18.3547	1.66812e-66	3.2734e-63	140.538
ACADSB	-0.602118	5.20073	-18.2581	6.67031e-66	1.07095e-62	139.163
EEA1	-0.634887	4.96047	-17.963	4.48938e-64	4.17299e-61	134.984
TXLNG	-0.586829	6.2675	-17.2491	1.00584e-59	5.38305e-57	125.041
JADE3	-0.616489	6.10871	-16.7749	6.82161e-57	2.36229e-54	118.57
GPR160	-0.911035	8.54394	-16.6681	2.91753e-56	9.03973e-54	117.128
EIF1AX	-0.591575	8.21665	-16.4598	4.88576e-55	1.19844e-52	114.331
SATB2	-1.05742	6.07716	-16.2051	1.48613e-53	2.82221e-51	110.943
TRIM2	-0.610671	6.1068	-16.0728	8.64773e-53	1.46853e-50	109.195
SRFBP1	-0.586739	5.53008	-16.0307	1.51052e-52	2.44746e-50	108.642
ADD3	-0.604324	8.78886	-16.0268	1.59173e-52	2.5556e-50	108.59
CFTR	-0.906311	5.56103	-15.7575	5.5313e-51	7.18297e-49	105.07
GPSM2	-0.667919	6.17939	-15.4245	4.21555e-49	4.30352e-47	100.771
GLCE	-0.649196	6.47349	-15.2403	4.51866e-48	4.05097e-46	98.4181
SLC35A3	-0.600436	6.8485	-15.0964	2.84022e-47	2.35498e-45	96.5949
CXADR	-0.647779	7.4142	-14.8815	4.3325e-46	3.13592e-44	93.8926
LRRC2	-0.646636	3.37231	-14.8753	4.68218e-46	3.37518e-44	93.8156
ACSL6	-0.801153	3.50358	-14.713	3.6026e-45	2.33917e-43	91.7922
PANK1	-0.601847	6.46677	-14.7017	4.1472e-45	2.66341e-43	91.6526
SCML1	-0.663568	6.24692	-14.6322	9.88033e-45	6.10128e-43	90.7918
ATP7B	-0.602422	5.37024	-14.6254	1.07564e-44	6.59615e-43	90.7076
POF1B	-0.617593	6.71877	-14.5893	1.68764e-44	1.01725e-42	90.261
CDCA7	-0.626541	7.76468	-14.4329	1.17308e-43	6.45414e-42	88.3386
GIPC2	-0.773168	6.27501	-14.3809	2.22949e-43	1.19681e-41	87.702
VAV3	-1.16497	6.64433	-14.2516	1.09084e-42	5.35147e-41	86.1279
SPAG1	-0.842493	6.69369	-14.179	2.64821e-42	1.25054e-40	85.2487
PLCB4	-1.2458	7.5193	-13.8145	2.17392e-40	8.27448e-39	80.8797
HES4	0.679601	5.84978	13.7806	3.25935e-40	1.21186e-38	80.4783
ESF1	-0.646783	5.95652	-13.6877	9.87256e-40	3.57293e-38	79.38
MYRIP	-0.632196	3.91894	-13.6356	1.83484e-39	6.48102e-38	78.7658
OTUD6B	-0.603663	5.7128	-13.62	2.20816e-39	7.67981e-38	78.5823
ENPP5	-0.608718	4.01686	-13.4612	1.43944e-38	4.64655e-37	76.7247
FAM217B	-0.621681	6.01855	-13.4492	1.65712e-38	5.30189e-37	76.5851
ZBTB10	-0.606576	4.43305	-13.2277	2.20247e-37	6.30434e-36	74.022
SLC12A2	-0.61029	9.1451	-12.9093	8.5824e-36	2.13184e-34	70.3939
LRRC19	-1.0415	5.46339	-12.907	8.8121e-36	2.18582e-34	70.3677
CTTNBP2	-0.819565	4.40369	-12.8852	1.12992e-35	2.76776e-34	70.1215
TSPAN6	-0.64516	8.96923	-12.8072	2.73994e-35	6.50405e-34	69.2442
GPCPD1	-0.630121	6.78313	-12.4192	2.11729e-33	4.33296e-32	64.9396
SPHK1	0.657605	5.14628	12.3516	4.46988e-33	8.85999e-32	64.1998
GUCY2C	-0.787565	7.5876	-12.247	1.41124e-32	2.70912e-31	63.0618
LRIF1	-0.617524	5.78101	-12.1302	5.04715e-32	9.31428e-31	61.8004
ZNRF3	-0.591063	7.02493	-12.0971	7.2352e-32	1.32005e-30	61.444
IYD	-0.616563	4.59145	-11.9906	2.28974e-31	4.01581e-30	60.3039
SEMA3C	-0.629779	6.61644	-11.9439	3.78336e-31	6.51883e-30	59.8069
LRRC31	-0.765787	5.1452	-11.8008	1.74849e-30	2.85926e-29	58.2923
MACC1	-0.604989	6.11226	-11.3504	1.96795e-28	2.75623e-27	53.6202
CRIP1	0.673952	6.14136	11.3378	2.24277e-28	3.11152e-27	53.491
LY75	-0.588813	6.84533	-11.1366	1.76064e-27	2.26307e-26	51.4537
CDH17	-0.618852	10.1855	-10.999	7.08814e-27	8.71146e-26	50.0769
GGH	-0.673928	8.16596	-10.9641	1.0078e-26	1.22497e-25	49.7291
TINAG	-0.630709	4.33416	-10.8864	2.19299e-26	2.59066e-25	48.9607
TRNP1	0.632315	4.72413	10.7259	1.08017e-25	1.21975e-24	47.3851
FSCN1	0.683118	5.87567	10.6348	2.64454e-25	2.88126e-24	46.5005
ENPP3	-0.896195	4.62277	-10.4651	1.38165e-24	1.41048e-23	44.8674
MT2A	0.606504	9.35945	10.3908	2.82967e-24	2.83304e-23	44.1594
NOX1	-0.887366	8.31779	-10.2795	8.21303e-24	7.98725e-23	43.1073
GSPT2	-0.794832	5.96798	-10.2693	9.04793e-24	8.74633e-23	43.0117
DDC	-0.673322	7.15516	-10.2308	1.30584e-23	1.25e-22	42.6494
CDHR1	-0.886518	5.45163	-10.1163	3.85411e-23	3.58249e-22	41.5811
CYP2B6	-0.706621	4.67128	-10.058	6.65851e-23	6.08359e-22	41.0414
PTPRD	-0.657102	4.54138	-9.88655	3.27976e-22	2.84918e-21	39.468
OXGR1	-0.680496	3.80754	-9.79664	7.49899e-22	6.32472e-21	38.6521
GRM8	-0.636183	4.23328	-9.79583	7.55478e-22	6.36569e-21	38.6448
LRP4	-0.837588	6.55141	-9.73198	1.35394e-21	1.12263e-20	38.0693
AXIN2	-0.606527	6.84141	-9.67962	2.17937e-21	1.77373e-20	37.5998
RNF43	-0.597091	7.99996	-9.64786	2.90607e-21	2.3425e-20	37.316
PPP1R14C	-0.73444	6.28169	-9.59483	4.68986e-21	3.74109e-20	36.8441
NAT2	-0.638476	5.86784	-9.52368	8.88278e-21	6.93847e-20	36.2143
ACE2	-0.820221	5.17868	-9.2863	7.26884e-20	5.32676e-19	34.1424
SPDEF	0.62514	6.1807	9.27974	7.69891e-20	5.62326e-19	34.0857
CLIC3	0.654739	5.17948	9.23301	1.15805e-19	8.32407e-19	33.6835
DACH1	-0.700226	5.8561	-9.07152	4.68447e-19	3.23048e-18	32.3068
EREG	-0.910883	5.56972	-9.06053	5.14795e-19	3.53766e-18	32.2139
SLC16A9	-0.586964	5.05359	-9.04106	6.08336e-19	4.1482e-18	32.0495
TNNT1	0.61321	3.65239	8.97996	1.02509e-18	6.90733e-18	31.5356
RAMP1	0.751334	6.0517	8.90494	1.93741e-18	1.28441e-17	30.9089
DUSP4	0.719911	5.55402	8.88778	2.23957e-18	1.48028e-17	30.7662
CFD	0.676665	6.51634	8.83048	3.62788e-18	2.3522e-17	30.2914
MAP7D2	-0.854493	4.17464	-8.65106	1.61472e-17	1.00202e-16	28.8221
LGR5	-0.786378	6.59056	-8.63354	1.86547e-17	1.15277e-16	28.6801
APOE	0.652705	7.4943	8.48222	6.42437e-17	3.84222e-16	27.4639
C10orf99	-1.05253	8.2634	-8.43176	9.66333e-17	5.73083e-16	27.0625
REEP1	-0.623594	4.4414	-8.42262	1.04023e-16	6.15048e-16	26.99
HOXC6	0.730078	4.16825	8.37187	1.56434e-16	9.13615e-16	26.5889
MSLN	0.851538	5.70853	8.28426	3.14819e-16	1.79994e-15	25.9015
IL33	-0.769669	5.75959	-8.26264	3.73747e-16	2.12721e-15	25.7329
MT1E	0.632528	8.24907	7.88413	7.07916e-15	3.6632e-14	22.8445
TFF2	0.778451	5.17263	7.56649	7.61298e-14	3.6786e-13	20.515
PRSS2	0.749274	5.73238	7.36738	3.23025e-13	1.48683e-12	19.099
BST2	0.586059	7.79341	7.33908	3.95589e-13	1.80623e-12	18.9006
ISX	-0.628021	5.6421	-7.19319	1.11232e-12	4.93711e-12	17.8887
FABP1	-0.815398	8.2198	-7.03233	3.40486e-12	1.45495e-11	16.7945
QPRT	-0.63934	7.01275	-7.01137	3.93251e-12	1.67032e-11	16.6536
CKMT2	-0.721787	4.64181	-6.93232	6.74924e-12	2.81926e-11	16.1257
KLK10	0.591537	5.17415	6.90844	7.9367e-12	3.30045e-11	15.9673
SLC26A2	-0.631498	6.93991	-6.87512	9.94311e-12	4.10485e-11	15.7472
MEP1A	-0.698699	7.66013	-6.86993	1.02971e-11	4.24701e-11	15.713
CCL20	-0.595727	8.57214	-6.73142	2.59886e-11	1.03515e-10	14.809
SLC26A3	-0.884926	6.06906	-6.56777	7.59323e-11	2.91404e-10	13.763
CYP4X1	-0.65654	4.72259	-6.55731	8.12526e-11	3.11078e-10	13.697
COMP	0.627479	4.95655	6.38222	2.48919e-10	9.17588e-10	12.606
IGLJ3	0.588768	5.23941	6.35565	2.94315e-10	1.07728e-09	12.4429
UGT2A3	-0.618649	3.81603	-6.04641	1.97562e-09	6.75666e-09	10.591
TCN1	0.782271	5.64493	5.92082	4.17846e-09	1.38688e-08	9.8637
SFRP2	0.769743	6.62773	5.89021	5.00469e-09	1.64933e-08	9.68862
REG4	0.941793	7.18279	5.85914	6.00513e-09	1.96256e-08	9.51183
MUC12	-0.592848	5.97741	-5.82514	7.32364e-09	2.37457e-08	9.31933
SDR16C5	0.599554	5.59903	5.68429	1.64847e-08	5.16841e-08	8.53311
CTSE	0.69105	5.82451	5.59113	2.79166e-08	8.57302e-08	8.02318
CEL	-0.789277	5.84368	-5.56717	3.19283e-08	9.73895e-08	7.89328
HMGCS2	-0.605635	7.09853	-5.56361	3.25693e-08	9.92762e-08	7.87406
DPEP1	-0.622981	7.86642	-5.50927	4.40677e-08	1.32428e-07	7.58167
KRT23	-0.705302	6.36879	-5.33836	1.12105e-07	3.24732e-07	6.67982
PLA2G2A	0.654554	8.68534	4.65059	3.67704e-06	9.10163e-06	3.32604
OLFM4	-0.825173	9.85081	-4.54906	5.93576e-06	1.43193e-05	2.86861
CEACAM7	-0.610165	7.31446	-4.52047	6.78137e-06	1.62549e-05	2.74154

## Sheet: S6
Table S6.Correlation analysis between model gene expression and drug sensitivity.
Gene	Drug	cor	pvalue
SFRP2	Caffeic acid	0.775921	3.30203e-13
HES4	Cobimetinib (isomer 1)	-0.529935	1.33442e-05
HES4	Selumetinib	-0.501039	4.55316e-05
HES4	Trametinib	-0.485711	8.35823e-05
HES4	ARRY-162	-0.47619	0.000120164
SFRP2	Idelalisib	0.45529	0.000257073
HES4	Acetalax	0.433131	0.000546844
HES4	ABT-199	-0.420376	0.00082546
HES4	Bisacodyl, active ingredient of Viraplex	0.414812	0.000982985
SFRP2	IPI-145	0.412984	0.00104036
HES4	Panobinostat	-0.397192	0.00167642
HOXC6	Eribulin mesilate	-0.384265	0.00243589
HES4	Crizotinib	-0.367605	0.00385892
TNNT1	Econazole Nitrate	0.363139	0.00434803
HES4	Encorafenib	-0.35608	0.0052331
SFRP2	BLU-667	0.337063	0.00845073
HOXC6	Palbociclib	-0.336352	0.00859894
SFRP2	Noscapine	0.335416	0.00879727
HES4	DACARBAZINE	-0.333981	0.0091091
HES4	LEE-011	-0.333747	0.00916085
TNNT1	Ifosfamide	-0.333592	0.00919512
TNNT1	Carmustine	-0.332761	0.00938164
SFRP2	malacid	-0.331141	0.0097545
SPHK1	rifa	-0.322474	0.0119759
SFRP2	Econazole Nitrate	-0.317359	0.0134821
HES4	Dabrafenib	-0.31577	0.0139818
HOXC6	brigatinib	-0.311536	0.0153921
TNNT1	BMN-673	-0.310929	0.0156039
SFRP2	METHOTREXATE	-0.308083	0.016631
SFRP2	florid	0.307335	0.0169103
TNNT1	Bisacodyl, active ingredient of Viraplex	0.306968	0.0170486
SPHK1	LDK-378	-0.306775	0.0171219
TNNT1	Melphalan	-0.305459	0.0176286
HES4	DIGOXIN	0.305102	0.0177679
SPHK1	RAPAMYCIN	0.301963	0.0190365
HES4	Vemurafenib	-0.299757	0.0199733
SFRP2	Amphotericin B	-0.299366	0.0201433
HOXC6	Vinblastine	-0.29876	0.0204092
HOXC6	Panobinostat	-0.298272	0.0206256
SFRP2	MK-2206	0.297282	0.0210708
SPHK1	Carfilzomib	-0.296407	0.0214708
HES4	LY-2835219	-0.29629	0.0215245
TNNT1	gilteritinib	-0.296258	0.0215396
HOXC6	Haloperidol	0.295835	0.0217358
SFRP2	Ancitabine hydrochloride	-0.294825	0.0222105
SPHK1	Actinomycin D	-0.294035	0.0225875
SFRP2	JNJ-42756493	0.292242	0.0234644
SFRP2	Midostaurin	0.29169	0.02374
TNNT1	rifa	-0.291124	0.0240253
SFRP2	Panobinostat	-0.290602	0.0242908
SPHK1	Temsirolimus	0.289664	0.0247747
HES4	Cabozantinib	-0.287896	0.025709
SFRP2	Abiraterone	0.285749	0.0268829
TNNT1	Pipobroman	-0.285713	0.0269031
HES4	tepotinib	-0.285674	0.026925
SPHK1	Pazopanib	0.285581	0.0269766
SPHK1	Dexrazoxane	-0.281945	0.029074
TNNT1	Sonidegib	0.280409	0.03
TNNT1	Acetalax	0.280344	0.0300401
SPHK1	Vinorelbine	-0.279799	0.0303746
SPHK1	VINORELBINE	-0.279526	0.0305434
SPHK1	Econazole Nitrate	0.279438	0.0305982
TNNT1	IDEBENONE	0.278426	0.031232
TNNT1	Lomustine	-0.276851	0.0322403
TNNT1	Hydroxychloroquine Sulfate	-0.276461	0.0324943
SFRP2	Zoledronate	0.276191	0.0326709
TNNT1	Bendamustine	-0.275523	0.0331116
HOXC6	Zalcitabine	-0.275407	0.0331886
TNNT1	Fulvestrant	0.272135	0.0354235
HOXC6	Depsipeptide	-0.27114	0.0361273
HOXC6	Quizartinib	0.270281	0.0367448
SPHK1	Ribavirin	-0.270001	0.0369474
SPHK1	Palbociclib	-0.267305	0.0389499
SFRP2	PENTAMIDINE ISETHIONATE	0.266518	0.0395512
HES4	Vincristine	-0.263948	0.0415678
HES4	Quizartinib	0.263157	0.0422055
TNNT1	Valrubicin	-0.263123	0.0422331
SPHK1	LEE-011	-0.26268	0.0425945
SPHK1	Depsipeptide	-0.261685	0.0434138
HES4	Sunitinib	-0.261659	0.0434356
HOXC6	Econazole Nitrate	0.261645	0.0434467
TNNT1	Idarubicin	-0.261149	0.0438603
SPHK1	Paclitaxel	-0.261045	0.0439476
TNNT1	DECITABINE	-0.26097	0.0440106
HOXC6	Nelarabine	-0.260841	0.0441194
TNNT1	M-AMSA	-0.259042	0.0456544
TNNT1	ciclosporin	-0.257754	0.04678
SPHK1	Lenvatinib	0.257651	0.0468703
HES4	Palbociclib	-0.256242	0.0481302
SPHK1	Bleomycin	0.25461	0.0496231
